# Supplementary material
Source: MDPI journal article supplement (https://www.mdpi.com/2076-3417/9/17/3546)
Supplement: s1 [file s1]

# Supplementary Materials: Low Level of Allergens in the Argentinean Plant *Zuccagnia punctata* Cav.: Screening and Quality Control of North-Western Propolis Using an LC-DAD-QTOF System

Eliana Rita Solorzano, Iole Maria Di Gangi, Marco Roverso, Gabriella Favaro, Sara Bogialli \* and Paolo Pastore

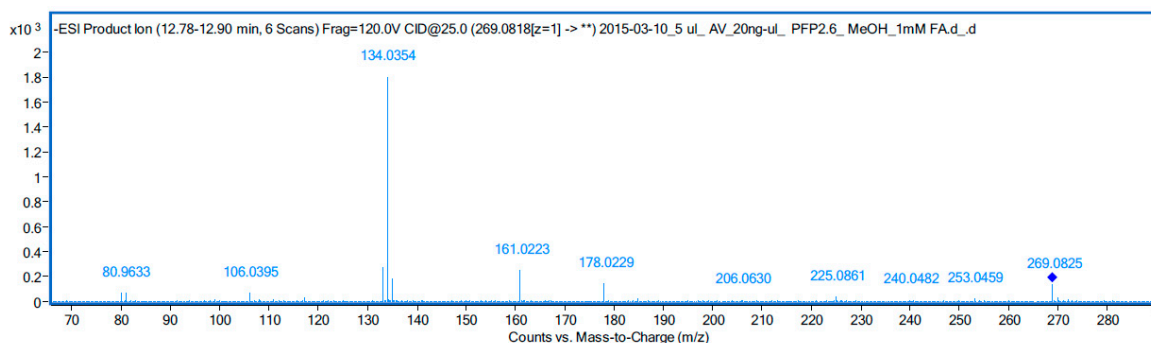

**Figure S1.** Tandem mass spectrometric spectrum of the compound (s4), identified as benzyl caffeate in Amaicha del Valle propolis.

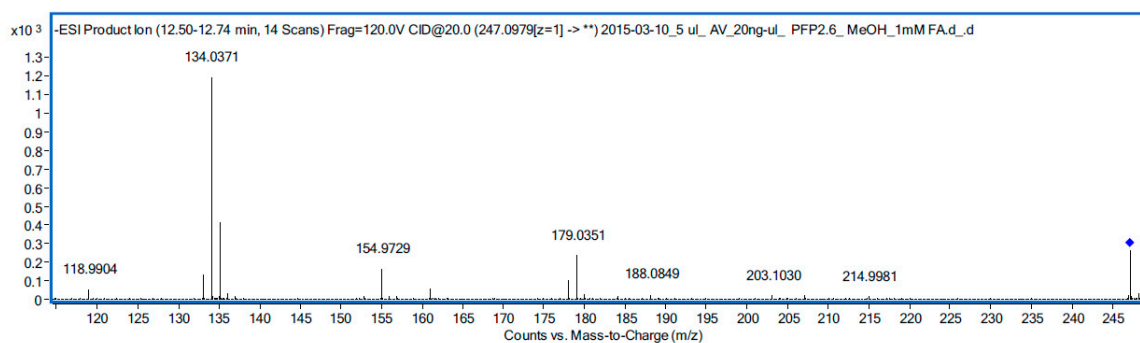

**Figure S2.** Tandem mass spectrometric spectrum of the compound (s2), identified as prenyl caffeates in Amaicha del Valle propolis.

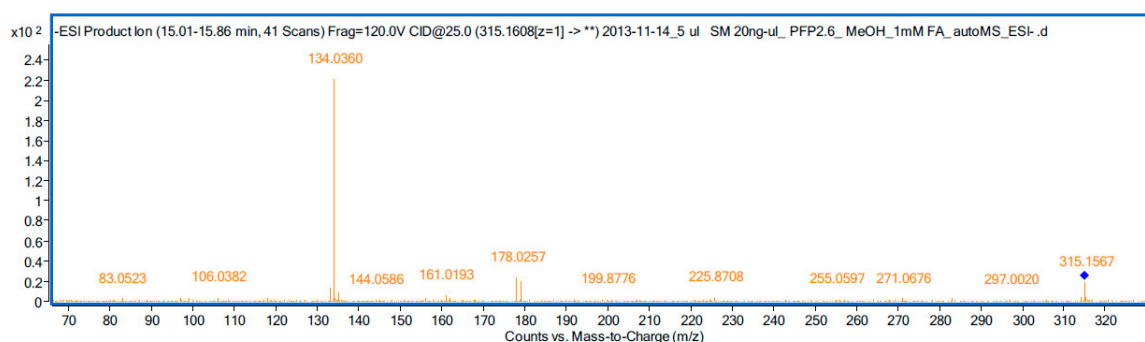

**Figure S3.** Tandem mass spectrometric spectrum of the compound (s7), identified as geranyl caffeate in Santa Maria propolis.

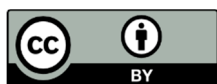

© 2019 by the authors. Submitted for possible open access publication under the terms and conditions of the Creative Commons Attribution (CC BY) license (<http://creativecommons.org/licenses/by/4.0/>).
